# Supplementary material for: Navigating chemical reaction space – application to DNA-encoded chemistry
Source: Royal Society of Chemistry journal article supplement (doi:10.1039/d2sc02474h), 2022-01-01
Supplement: d2sc02474h1.xlsx [file d2sc02474h1.xlsx]

## Sheet: default
Reaction ID (RX.ID)	Reaction_smiles	Time (RXD.TIM)	Citation Pointer (RXD.L)	ROOT:RXD:T	RGT_CAT_score	Solvent_boiling-point	LG	Winner Cluster
UGI								cluster_36
4171683		20	5953971		3	40		cluster_53
4664319			6055311		3			cluster_4
9509924			6428558		3			cluster_44
29173593		72	8846661	100	3	101		cluster_28
633612			1609844		3			cluster_22
3297832		10	5902396		3	100		cluster_40
10414591		10	6609436		3	0		cluster_5
29173593
