# Supplementary material for: Navigating chemical reaction space – application to DNA-encoded chemistry
Source: Royal Society of Chemistry journal article supplement (doi:10.1039/d2sc02474h), 2022-01-01
Supplement: d2sc02474h3.xlsx [file d2sc02474h3.xlsx]

## Sheet: default
nearest neighbor - Reaction_smiles	farthest neighbor - Reaction_smiles	Reaction ID (RX.ID)	Reaction ID (RX.ID) (right)	Cluster_NN_Arr[0]
		20020025958A103372002	20020183327A102162002	cluster_22_2
		GEVORGYAN	20030119842A101642003	cluster_58_1
		20070281963A109732007	20040039061A101812004	cluster_4_3
		20110039830A101232011	20040122244A103912004	cluster_4_1
		20060104998A102662006	20060217378A101632006	cluster_22_4
		20070254915A101582007	20070254915A101582007	cluster_10_2
		20020006936A104042002	20080096913A105162008	cluster_29_1
		20070270420A101862007	20080275069A107982008	cluster_23_1
		20020183320A101592002	20080275069A108222008	cluster_30_2
		20110206607A103742011	20110206607A103742011	cluster_15_2
		20030018191A103032003	20110224208A111282011	cluster_36_3
		20070099895A103102007	20120142928A106972012	cluster_16_2
		20040052822A104322004	20120208817A105882012	cluster_27_1
		20100204198A104602010	20130090472A102152013	cluster_47_3
		20040052822A104322004	20150224107A105962015	cluster_27_1
		20050192265A114412005	UGI	cluster_6_2
		20060063787A115822006	20020007059A103132002	cluster_21_3
		20020007059A103712002	20020007059A103712002	cluster_17_1
		20020007065A101792002	20020007065A101792002	cluster_31_1
		20080280910A102142008	20020091261A104442002	cluster_26_1
		20080275069A108222008	20020183320A101592002	cluster_30_4
		QUINOLINE_SYNTH	20020183320A101692002	cluster_30_5
		20110224208A111282011	20030018191A103032003	cluster_36_1
		20140179676A109022014	20040023927A102412004	cluster_15_3
		20120208817A105882012	20040052822A104322004	cluster_27_2
		20150224107A105962015	20040052822A104322004	cluster_27_2
		20040052822A109572004	20040052822A109572004	cluster_51_1
		20110224208A111772011	20040053924A101512004	cluster_50_2
		20050107425A105422005	20050065066A115162005	cluster_37_2
		20050147903A100872005	20050147903A100872005	cluster_58_2
		20050266329A101062005	20050147903A100872005	cluster_58_2
		UGI	20050192265A114412005	cluster_6_3
		20050147903A100872005	20050266329A101062005	cluster_58_2
		20050266329A101062005	20050266329A101062005	cluster_58_2
		20090312313A117492009	20060004063A101182006	cluster_38_1
		20020028841A101292002	20060014959A101252006	cluster_47_2
		20120208817A103552012	20060079518A102342006	cluster_5_1
		20060217378A101632006	20060104998A102662006	cluster_22_3
		20110237791A104222011	20070129421A102332007	cluster_52_2
		20020137741A101812002	20070208007A102522007	cluster_39_1
		20020137741A101812002	20070208033A112332007	cluster_39_1
		20080064704A105002008	20080064704A105002008	cluster_21_2
		20090023800A115232009	20080081907A103162008	cluster_28_2
		20100240743A115382010	20080081907A103162008	cluster_28_2
		20090137581A102882009	20080096953A101862008	cluster_4_2
		20050143438A102572005	20080262036A106292008	cluster_53_1
		20110158971A102582011	20080262036A106292008	cluster_53_1
		20080081907A103162008	20090023800A115232009	cluster_28_5
		20090137561A108842009	20090137561A108842009	cluster_36_2
		20080096953A101862008	20090137581A102882009	cluster_4_5
		20130090472A102152013	20100204198A104602010	cluster_47_4
		20120232072A104992012	20100222600A106012010	cluster_37_5
		20080081907A103162008	20100240743A115382010	cluster_28_5
		20110201815A101772011	20110201815A101772011	cluster_41_1
		20070129421A102332007	20110237791A104222011	cluster_52_1
		20090036436A106102009	20120101127A102582012	cluster_20_3
		20140235640A105832014	20120208817A103372012	cluster_54_1
		20150224107A105802015	20120208817A103372012	cluster_54_1
		20060079518A102342006	20120208817A103552012	cluster_5_2
		20100222600A106012010	20120232072A104992012	cluster_37_4
		20130012499A102752013	20130012499A102752013	cluster_1_1
		20130196994A102072013	20130035354A103722013	cluster_46_1
		20130035354A103722013	20130196994A102072013	cluster_46_2
		20050148777A113832005	20130211079A100682013	cluster_40_1
		20040023927A102412004	20140179676A109022014	cluster_15_1
		20140221422A102392014	20140221422A102392014	cluster_50_5
		20120208817A103372012	20140235640A105832014	cluster_54_3
		20140235640A106552014	20140235640A106552014	cluster_54_2
		20080146574A103672008	20140275156A104082014	cluster_0_2
		20080090782A103292008	20150038534A110322015	cluster_43_3
		20120208817A103372012	20150224107A105802015	cluster_54_3
		20160108051A102412016	20160007606A101432016	cluster_20_4
		20160038503A102492016	20160038503A102492016	cluster_53_2
		20120295904A112382012	20160096834A102422016	cluster_9_1
		20140243324A112862014	20160096834A102422016	cluster_9_1
		20160007606A101432016	20160108051A102412016	cluster_20_1
		GROEBKE-BLACKBURN-BIENYAME'	GROEBKE-BLACKBURN-BIENYAME'	cluster_30_3
		20030119842A101642003	GEVORGYAN	cluster_58_3
		20020183320A101692002	QUINOLINE_SYNTH	cluster_30_1
		20030119842A102202003	BENZOFURAN_SYNTH	cluster_22_1
		20010056109A101522001	20010056109A101522001	cluster_12_1
		20080096913A105162008	20020006936A104042002	cluster_29_5
		20080281105A102482008	20020006936A106122002	cluster_29_4
		20020183327A102162002	20020025958A103372002	cluster_22_5
		20060014959A101252006	20020028841A101292002	cluster_47_5
		20090312313A107872009	20020052369A103652002	cluster_24_5
		20070232649A104432007	20020068756A102182002	cluster_34_1
		20070208007A102522007	20020137741A101812002	cluster_39_4
		20070208033A112332007	20020137741A101812002	cluster_39_4
		20070249688A103892007	20020147212A101842002	cluster_18_3
		20100324140A104102010	20020147212A101842002	cluster_18_3
		20040181075A106562004	20030166649A103642003	cluster_24_4
		20030207883A107622003	20030207883A107622003	cluster_57_2
		20040039038A102382004	20040039038A102382004	cluster_29_3
		20050075375A111282005	20040044203A102592004	cluster_14_1
		20090253888A102182009	20040162279A105542004	cluster_10_3
		20100093705A104072010	20040167188A102272004	cluster_43_2
		20030166649A103642003	20040181075A106562004	cluster_24_3
		20110224208A110952011	20040248965A100362004	cluster_50_3
		20050038069A110122005	20050038069A110122005	cluster_55_5
		20150266876A100392015	20050065118A103472005	cluster_57_3
		20150266876A100422015	20050065118A103472005	cluster_57_3
		20040044203A102592004	20050075375A111282005	cluster_14_2
		20050119282A103692005	20050119282A103692005	cluster_18_2
		20080262036A106292008	20050143438A102572005	cluster_53_3
		20130211079A100682013	20050148777A113832005	cluster_40_2
		20030100555A104452003	20050267100A102552005	cluster_24_1
		20110213143A105372011	20050267100A103122005	cluster_55_1
		20080188514A103602008	20060040999A104772006	cluster_28_3
		20110230482A111972011	20060040999A104772006	cluster_28_3
		20020007059A103132002	20060063787A115822006	cluster_21_1
		20070232651A103942007	20060079497A101282006	cluster_33_2
		20020040029A102692002	20060079519A102232006	cluster_47_1
		20050148599A102642005	20060079519A102232006	cluster_47_1
		20080090854A112442008	20060189681A113222006	cluster_50_4
		20110224208A111432011	20060189681A113402006	cluster_37_3
		20060241083A101862006	20060241083A101862006	cluster_43_4
		20120142928A106972012	20070099895A103102007	cluster_16_1
		20020068756A102182002	20070232649A104432007	cluster_34_2
		20060079497A101282006	20070232651A103942007	cluster_33_1
		20020147212A101842002	20070249688A103892007	cluster_18_1
		20080275069A107982008	20070270420A101862007	cluster_23_2
		20040039061A101812004	20070281963A109732007	cluster_4_4
		20150038534A110322015	20080090782A103292008	cluster_43_5
		20140171309A107082014	20080121870A102732008	cluster_11_1
		20160029635A106802016	20080121870A102732008	cluster_11_1
		20140275156A104082014	20080146574A103672008	cluster_0_1
		20060040999A104772006	20080188514A103602008	cluster_28_4
		20160075724A104782016	20080188514A103602008	cluster_28_4
		20060040999A103092006	20080275053A103382008	cluster_6_4
		20020091261A104442002	20080280910A102142008	cluster_26_2
		20020006936A106122002	20080281105A102482008	cluster_29_2
		20120101127A102582012	20090036436A106102009	cluster_20_2
		20090281149A114012009	20090176980A106002009	cluster_2_1
		SnAP_6	20090227541A104662009	cluster_13_2
		20040162279A105542004	20090253888A102182009	cluster_10_1
		20090176980A106002009	20090281149A114012009	cluster_2_2
		20020052369A103652002	20090312313A107872009	cluster_24_2
		20060004063A101182006	20090312313A117492009	cluster_38_2
		20090149439A101252009	20090318410A102802009	cluster_43_1
		20070129421A101782007	20100256365A111342010	cluster_55_3
		20060074102A107932006	20100273764A110472010	cluster_55_4
		20020147212A101842002	20100324140A104102010	cluster_18_1
		20070129421A102232007	20100331293A115292010	cluster_28_1
		20150119392A101642015	20100331306A102322010	cluster_39_3
		20080262036A106292008	20110158971A102582011	cluster_53_3
		20060040999A104772006	20110230482A111972011	cluster_28_4
		20160075724A104782016	20110230482A111972011	cluster_28_4
		20110037056A101532011	20110313156A107142011	cluster_19_1
		20120142714A117692012	20120142714A117692012	cluster_3_1
		20110224208A109902011	20120270905A101432012	cluster_50_1
		20140243324A117512014	20120295904A107472012	cluster_9_4
		20120295904A108792012	20120295904A108792012	cluster_9_3
		20160096834A102422016	20120295904A112382012	cluster_9_5
		20140256744A105022014	20130231333A110042013	cluster_55_2
		20150329506A103172015	20140088117A104562014	cluster_35_1
		20140171308A105362014	20140171308A105362014	cluster_11_2
		20140171315A107442014	20140171308A105362014	cluster_11_2
		20160029636A107432016	20140171308A105362014	cluster_11_2
		20080121870A102732008	20140171309A107082014	cluster_11_3
		20140171308A105362014	20140171315A107442014	cluster_11_2
		20140171315A107442014	20140171315A107442014	cluster_11_2
		20160029636A107432016	20140171315A107442014	cluster_11_2
		20160096834A102422016	20140243324A112862014	cluster_9_5
		20120295904A107472012	20140243324A117512014	cluster_9_2
		20140336188A100962014	20140336188A100962014	cluster_32_1
		20150218207A100972015	20140336188A100962014	cluster_32_1
		20160229888A101412016	20140336188A100962014	cluster_32_1
		20020165245A101392002	20150028271A101052015	cluster_45_1
		20100331306A102322010	20150119392A101642015	cluster_39_2
		20140336188A100962014	20150218207A100972015	cluster_32_1
		20150218207A100972015	20150218207A100972015	cluster_32_1
		20160229888A101412016	20150218207A100972015	cluster_32_1
		20110224208A110972011	20150238500A107512015	cluster_37_1
		20050065118A103472005	20150266876A100392015	cluster_57_1
		20050065118A103472005	20150266876A100422015	cluster_57_1
		20080121870A102732008	20160029635A106802016	cluster_11_3
		20140171308A105362014	20160029636A107432016	cluster_11_2
		20140171315A107442014	20160029636A107432016	cluster_11_2
		20160029636A107432016	20160029636A107432016	cluster_11_2
		20080188514A103602008	20160075724A104782016	cluster_28_3
		20110230482A111972011	20160075724A104782016	cluster_28_3
		20070129421A101782007	20160176865A111322016	cluster_55_3
		20140336188A100962014	20160229888A101412016	cluster_32_1
		20150218207A100972015	20160229888A101412016	cluster_32_1
		20160229888A101412016	20160229888A101412016	cluster_32_1
		20120316192A101782012	20120316192A101782012	cluster_49_1
		20140249129A103722014	20090281052A101292009	cluster_56_3
		20080188520A101362008	20050032816A101892005	cluster_7_1
		20050032816A101892005	20080188520A101362008	cluster_7_4
		20140163002A106652014	20110098272A102862011	cluster_7_2
		20090281052A101292009	20140249129A103722014	cluster_56_1
		20140088117A104562014	20150329506A103172015	cluster_35_2
		20040023941A100822004	20120115862A103632012	cluster_48_5
		20130123253A106852013	20130035325A102512013	cluster_48_3
		20150223460A118052015	20110136763A107152011	cluster_45_2
		20120115862A103632012	20040023941A100822004	cluster_48_2
		20070032515A103642007	20070032515A103642007	cluster_42_1
		20080015215A113662008	20070232596A102782007	cluster_44_1
		20090270446A113682009	20070232596A102782007	cluster_44_1
		20080015215A113662008	20100183550A103432010	cluster_44_1
		20090270446A113682009	20100183550A103432010	cluster_44_1
		20110098272A102862011	20140163002A106652014	cluster_7_3
		20150005279A112602015	20150005279A112602015	cluster_8_1
		SnAP_1	SNAP	cluster_25_1
		SNAP	SnAP_1	cluster_25_2
		20090227541A104662009	SnAP_6	cluster_13_1
		20150028271A101052015	20020165245A101392002	cluster_45_4
		20090012093A117802009	20090012093A117802009	cluster_56_2
		20110313156A107142011	20110037056A101532011	cluster_19_2
		20130035325A102512013	20130123253A106852013	cluster_48_4
		20070232596A102782007	20080015215A113662008	cluster_44_2
		20100183550A103432010	20080015215A113662008	cluster_44_2
		20070232596A102782007	20090270446A113682009	cluster_44_2
		20100183550A103432010	20090270446A113682009	cluster_44_2
		20070161672A101382007	20140371232A102542014	cluster_48_1
		20080275053A103382008	20060040999A103092006	cluster_6_1
		20110136763A107152011	20150223460A118052015	cluster_45_3
