# Supplementary material for: Navigating chemical reaction space – application to DNA-encoded chemistry
Source: Royal Society of Chemistry journal article supplement (doi:10.1039/d2sc02474h), 2022-01-01
Supplement: d2sc02474h4.xlsx [file d2sc02474h4.xlsx]

## Sheet: default
nearest neighbor - Reaction_smiles	farthest neighbor - Reaction_smiles	Reaction ID (RX.ID)	Reaction ID (RX.ID) (right)	Cluster_NN_Arr[0]
		20120022067A106642012	20120022067A106642012	cluster_57_2
		20040087594A107262004	20020183320A102692002	cluster_21_4
		20070299068A148502007	20040023964A106402004	cluster_26_3
		20020002158A107692002	20050113576A103342005	cluster_33_1
		20100029629A104392010	20060199956A103662006	cluster_32_1
		20110282066A103292011	20080242654A105112008	cluster_25_3
		20080242654A107622008	20080242654A107622008	cluster_25_2
		20050261331A103652005	20090047244A105262009	cluster_3_4
		20130137687A102822013	20110086879A109132011	cluster_34_3
		20110009441A103502011	20110311466A104032011	cluster_57_1
		20150174110A106982015	20120277431A117162012	cluster_45_3
		20050215772A101762005	UGI	cluster_6_1
		20030022904A101172003	20030022904A101172003	cluster_43_1
		20030055035A109402003	20030055035A109402003	cluster_20_2
		20090270351A107502009	20030087926A106822003	cluster_40_4
		20080108809A105102008	20030176415A105152003	cluster_53_2
		20060173008A108252006	20040018192A110962004	cluster_14_4
		20020183320A102692002	20040087594A107262004	cluster_21_3
		20040023968A103882004	20040157850A106132004	cluster_29_2
		20070060607A103752007	20050014754A101932005	cluster_28_3
		20150148313A103122015	20050143421A107922005	cluster_55_2
		20110306722A101952011	20050250818A103532005	cluster_51_3
		20040106650A103182004	20060042678A100492006	cluster_21_2
		20130165460A108982013	20070010526A104282007	cluster_47_1
		20080009530A108942008	20080009530A108942008	cluster_41_1
		20080200529A101732008	20080032996A106162008	cluster_28_1
		20090131661A101792009	20080064699A103012008	cluster_31_2
		20030176415A105152003	20080108809A105102008	cluster_53_3
		20090069288A102562009	20080139558A102492008	cluster_53_4
		20130190338A108582013	20080139558A107802008	cluster_54_4
		20070082899A103292007	20080171739A104212008	cluster_58_3
		20080032996A106162008	20080200529A101732008	cluster_28_4
		20080275042A103452008	20080275042A103452008	cluster_30_2
		20080280962A102122008	20080280962A102122008	cluster_8_3
		20090209536A106062009	20090209536A106062009	cluster_38_2
		20060199956A103662006	20100029629A104392010	cluster_32_2
		20100048641A102992010	20100048641A102992010	cluster_0_4
		20100105740A101002010	20100105740A101002010	cluster_1_1
		20060069265A100662006	20100136142A103092010	cluster_20_3
		20110311466A104032011	20110009441A103502011	cluster_57_3
		20070259881A111752007	20110204333A101132011	cluster_0_3
		20090209536A107062009	20110301161A104622011	cluster_5_1
		20050250818A103532005	20110306722A101952011	cluster_51_4
		20020095041A102462002	20120202776A107442012	cluster_39_2
		20020068687A105232002	20120270905A101872012	cluster_30_3
		20070010526A104282007	20130165460A108982013	cluster_47_2
		20080139558A107802008	20130190338A108582013	cluster_54_1
		20040266738A101022004	20130197049A104152013	cluster_50_3
		20090298832A102772009	20130237552A109122013	cluster_24_3
		20130012488A104482013	20130252940A103612013	cluster_5_3
		20030207865A108292003	20140336383A105632014	cluster_8_2
		20050143421A107922005	20150148313A103122015	cluster_55_1
		20120277431A117162012	20150174110A106982015	cluster_45_1
		20040077625A107982004	20150174110A107422015	cluster_35_1
		20150231141A102232015	20150231141A102232015	cluster_56_1
		20070088163A101432007	20160264571A101692016	cluster_15_1
		20130317045A106642013	BIGINELLI	cluster_22_1
		20120214996A102632012	POVAROV	cluster_40_2
		QUINOLINE_SYNTH	GROEBKE-BLACKBURN-BIENYAME'	cluster_38_3
		20140364424A120332014	GEVORGYAN	cluster_5_5
		CUSHMAN	CUSHMAN	cluster_52_1
		GROEBKE-BLACKBURN-BIENYAME'	QUINOLINE_SYNTH	cluster_38_1
		20010016659A100812001	20010016659A100812001	cluster_48_1
		20010039289A103412001	20010039289A103412001	cluster_50_2
		20050113576A103342005	20020002158A107692002	cluster_33_2
		20080300241A901362008	20020016328A102072002	cluster_34_4
		20030158198A103442003	20020045615A103582002	cluster_37_2
		20120270905A101872012	20020068687A105232002	cluster_30_1
		20030036532A102322003	20020086887A111072002	cluster_54_3
		20020091089A102272002	20020091089A102272002	cluster_11_1
		20120202776A107442012	20020095041A102462002	cluster_39_1
		20070287724A109852007	20020107251A109522002	cluster_0_1
		20020086887A111072002	20030036532A102322003	cluster_54_2
		20050107471A101322005	20030078261A106332003	cluster_17_2
		20030166644A130102003	20030105091A102852003	cluster_12_3
		20020045615A103582002	20030158198A103442003	cluster_37_1
		20030105091A102852003	20030166644A130102003	cluster_12_1
		20060094761A105782006	20030176476A102662003	cluster_14_3
		20030186901A100982003	20030186901A100982003	cluster_45_2
		20030199511A103532003	20030199511A103532003	cluster_26_2
		20030199578A102692003	20030199578A102692003	cluster_12_2
		20120178934A101192012	20030207865A106412003	cluster_44_5
		20140336383A105632014	20030207865A108292003	cluster_8_4
		20090018122A109632009	20030212270A101512003	cluster_0_2
		BENZOFURAN_SYNTH	20030225273A106502003	cluster_21_1
		20040157850A106132004	20040023968A103882004	cluster_29_1
		20060241113A101342006	20040030137A105282004	cluster_24_5
		20150174110A107422015	20040077625A107982004	cluster_35_2
		20100069430A101252010	20040082542A108712004	cluster_58_4
		20080021087A117072008	20040106618A102372004	cluster_16_2
		20060042678A100492006	20040106650A103182004	cluster_21_5
		20080004391A102692008	20040176409A104782004	cluster_51_5
		20130197049A104152013	20040266738A101022004	cluster_50_1
		20030078261A106332003	20050107471A101322005	cluster_17_1
		20140088110A104232014	20050131014A107282005	cluster_27_2
		20040043982A102512004	20050171125A102052005	cluster_4_4
		20030181730A102032003	20050192347A103252005	cluster_49_1
		UGI	20050215772A101762005	cluster_6_2
		20080139536A101892008	20050239777A106472005	cluster_40_1
		20090047244A105262009	20050261331A103652005	cluster_3_2
		20060025597A104452006	20060025597A104452006	cluster_9_1
		20100136142A103092010	20060069265A100662006	cluster_20_1
		20030176476A102662003	20060094761A105782006	cluster_14_2
		20060111370A106432006	20060111370A106432006	cluster_44_3
		20080200445A105322008	20060111370A106432006	cluster_44_3
		20130018066A104372013	20060111370A106432006	cluster_44_3
		20120129851A103132012	20060128750A102172006	cluster_15_4
		20130012499A102752013	20060135552A101262006	cluster_27_3
		20040018192A110962004	20060173008A108252006	cluster_14_1
		20040030137A105282004	20060241113A101342006	cluster_24_2
		20070142351A105172007	20060241113A101342006	cluster_24_2
		20160016908A108082016	20070049606A101682007	cluster_8_5
		20050014754A101932005	20070060607A103752007	cluster_28_2
		20080171739A104212008	20070082899A103292007	cluster_58_2
		20060211728A100992006	20070120919A100462007	cluster_7_2
		20060241113A101342006	20070142351A105172007	cluster_24_5
		20070287842A100542007	20070167483A103262007	cluster_42_1
		20110204333A101132011	20070259881A111752007	cluster_0_5
		20040023964A106402004	20070299068A148502007	cluster_26_1
		20070299076A101262007	20070299076A101262007	cluster_19_2
		20110065708A103762011	20080004309A103292008	cluster_3_5
		20040176409A104782004	20080004391A102692008	cluster_51_2
		20070037827A114492007	20080081808A102342008	cluster_24_1
		20060111370A106432006	20080200445A105322008	cluster_44_3
		20080200445A105322008	20080200445A105322008	cluster_44_3
		20130018066A104372013	20080200445A105322008	cluster_44_3
		20090181963A105322009	20080262021A104632008	cluster_5_2
		20020016328A102072002	20080300241A901362008	cluster_34_1
		20150342927A102922015	20080318951A104212008	cluster_16_4
		20120283249A102542012	20090054268A100462009	cluster_13_2
		20080139558A102492008	20090069288A102562009	cluster_53_1
		20140221342A106522014	20090117625A102662009	cluster_36_2
		20140221342A106522014	20090130285A101982009	cluster_36_2
		20080064699A103012008	20090131661A101792009	cluster_31_1
		20040053908A106792004	20090149456A104622009	cluster_4_3
		20030087926A106822003	20090270351A107502009	cluster_40_3
		20130237552A109122013	20090298832A102772009	cluster_24_4
		20040082542A108712004	20100069430A101252010	cluster_58_1
		20120088778A106302012	20100069430A101252010	cluster_58_1
		20150218194A108512015	20100069457A101302010	cluster_27_1
		20130116234A109522013	20100215632A101852010	cluster_27_4
		20130116234A109522013	20110015192A102722011	cluster_27_4
		20110046370A102732011	20110046370A102732011	cluster_4_5
		20080004309A103292008	20110065708A103762011	cluster_3_1
		20120115856A108712012	20110124857A101162011	cluster_15_5
		20140329821A104942014	20110136800A104352011	cluster_23_2
		SnAP_6	20120041078A108732012	cluster_44_4
		20050004140A102442005	20120053166A106152012	cluster_4_2
		20100069430A101252010	20120088778A106302012	cluster_58_4
		20110124857A101162011	20120115856A108712012	cluster_15_2
		20060128750A102172006	20120129851A103132012	cluster_15_3
		20030207865A106412003	20120178934A101192012	cluster_44_1
		20080139536A101892008	20120197027A104522012	cluster_40_1
		POVAROV	20120214996A102632012	cluster_40_5
		20090054268A100462009	20120283249A102542012	cluster_13_1
		20060111370A106432006	20130018066A104372013	cluster_44_3
		20080200445A105322008	20130018066A104372013	cluster_44_3
		20130018066A104372013	20130018066A104372013	cluster_44_3
		20110092553A108122011	20130096150A115132013	cluster_4_1
		20100215632A101852010	20130116234A109522013	cluster_27_5
		20110015192A102722011	20130116234A109522013	cluster_27_5
		20110086879A109132011	20130137687A102822013	cluster_34_2
		20130211063A115912013	20130211063A115912013	cluster_46_1
		BIGINELLI	20130317045A106642013	cluster_22_2
		20090117625A102662009	20140221342A106522014	cluster_36_1
		20090130285A101982009	20140221342A106522014	cluster_36_1
		20110136800A104352011	20140329821A104942014	cluster_23_1
		20140296272A107732014	20140343094A112732014	cluster_19_3
		GEVORGYAN	20140364424A120332014	cluster_5_4
		20060040972A104752006	20150266857A104802015	cluster_51_1
		20160045477A101722016	20160045477A101722016	cluster_3_3
		20070049606A101682007	20160016908A108082016	cluster_8_1
		20080318951A104212008	20150342927A102922015	cluster_16_1
		20090197877A101852009	20070293696A100832007	cluster_18_2
		20070120919A100462007	20060211728A100992006	cluster_7_1
		20070167483A103262007	20070287842A100542007	cluster_42_2
		20070293696A100832007	20090197877A101852009	cluster_18_1
		PETASIS	PETASIS	cluster_2_1
		20140343094A112732014	20140296272A107732014	cluster_19_1
		20050192347A103252005	20030181730A102032003	cluster_49_2
		SNAP	SNAP	cluster_10_1
		20120041078A108732012	SnAP_6	cluster_44_2
		20040106618A102372004	20080021087A117072008	cluster_16_3
		20080242654A105112008	20110282066A103292011	cluster_25_1
